# Supplementary material for: Chemical modifications of adenine base editor mRNA and guide RNA expand its application scope
Source: PubMed Central journal article supplement (PMC7181807; doi:10.1038/s41467-020-15892-8), 2020-04-24
Supplement: 41467_2020_15892_MOESM1_ESM.pdf [file 41467_2020_15892_MOESM1_ESM.pdf]

## **Supplementary Information**

Chemical modifications of adenine base editor mRNA and guide RNA expand its application scope

Jiang et al.

# Supplementary Fig. 1

**a**

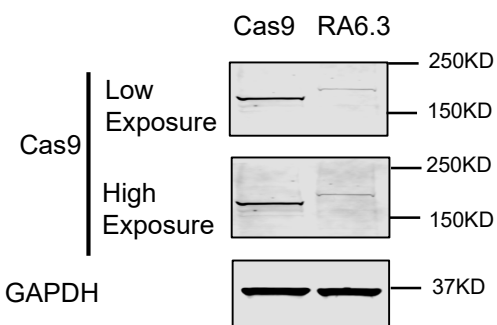

**b**

**RA6.3**

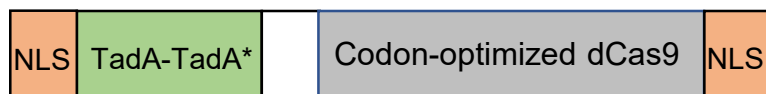

**c**

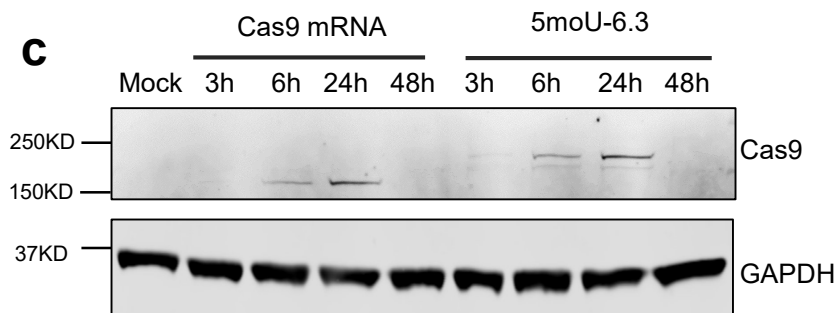

**d**

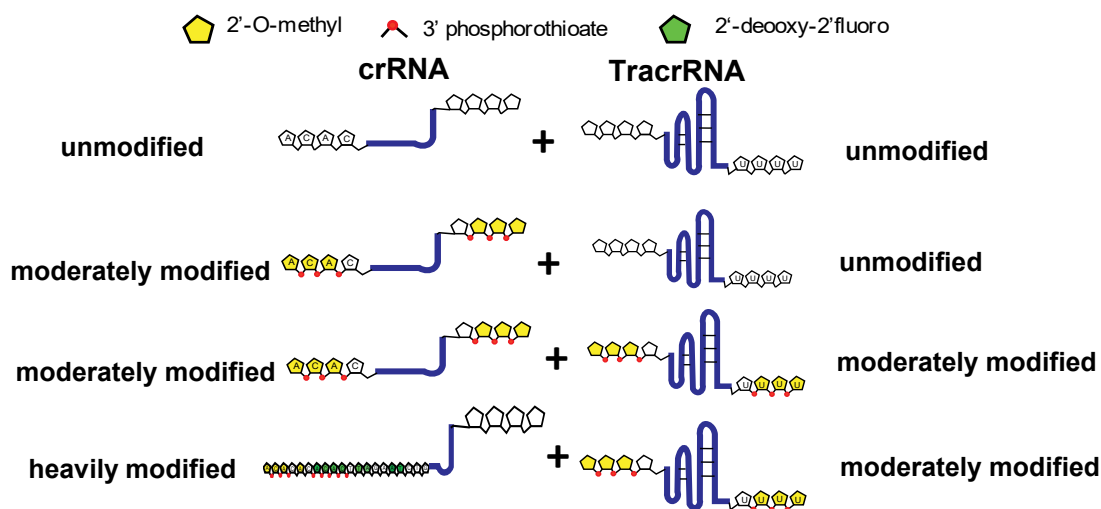

**e**

ACACA<sub>5</sub>CA<sub>7</sub>CA<sub>9</sub>CTTAGAATCTGTGG

5moU-6.3 mRNA + crRNA + tracrRNA

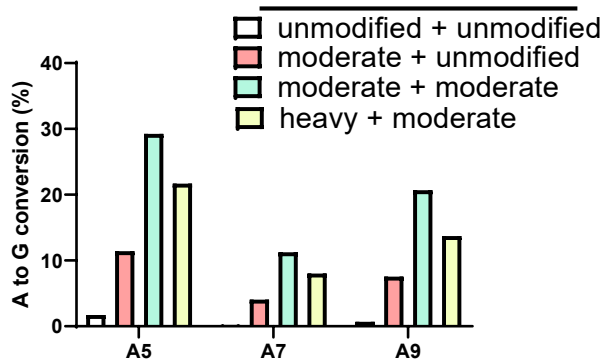

**f**

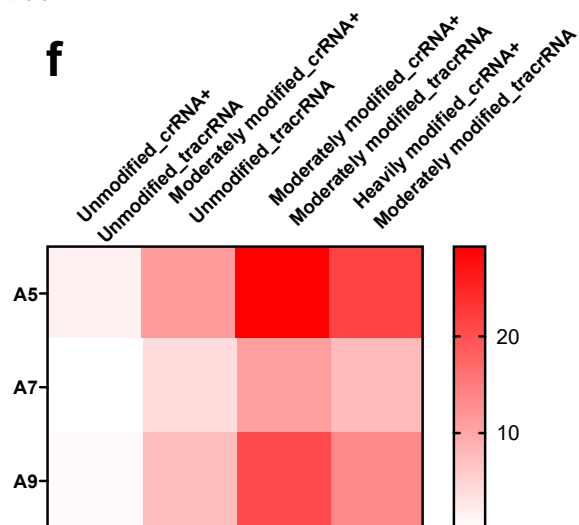

**g**

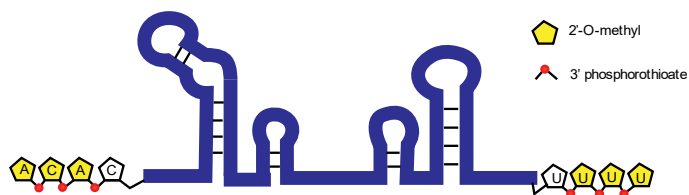

**Supplementary Fig.1. a**, The expression of Cas9 mRNA and in vitro transcribed RA6.3 mRNA in HEK293T cells. GAPDH as loading control. Experiments were done for twice, and one is shown. **b**, Schematic structure of RA6.3. NLS: nuclear localization signal. TadA\* denotes the evolved TadA version 6.3<sup>1</sup>. **c**, Protein expression level at different time points in post-transfected HEK293T cells by western blot. Experiments were done for twice, and one is shown. **d**, Schematic structure of unmodified and differently modified tracrRNAs and crRNAs **e**, A-to-G conversion rates mediated by 5moU-6.3 with different combinations of tracrRNA and crRNA in HEK293T cells. The editable “A” substrate nucleotides are in red. PAM sequence is underlined. The data is based on one experiment. **f**, Heatmap of conversion rates shown in e. **g**, Schematic structure of moderately modified sgRNA. Source data are provided as a Source Data file for a, c, e, f.

# Supplementary Fig. 2

**a**

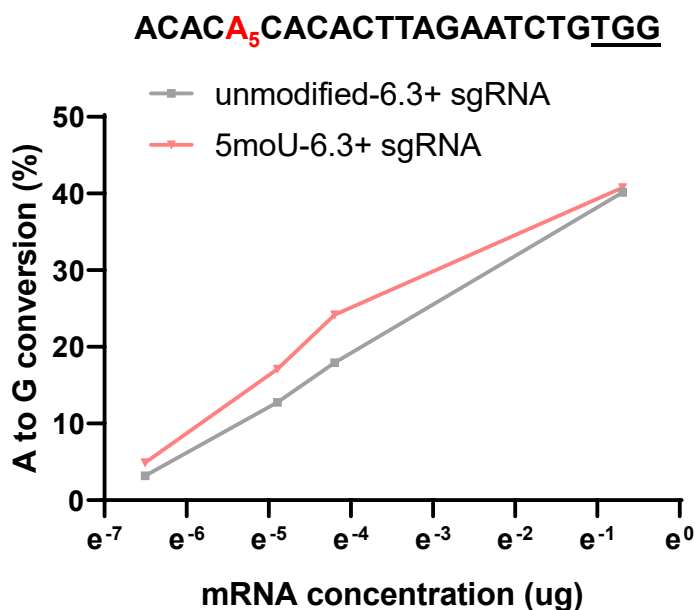

**b**

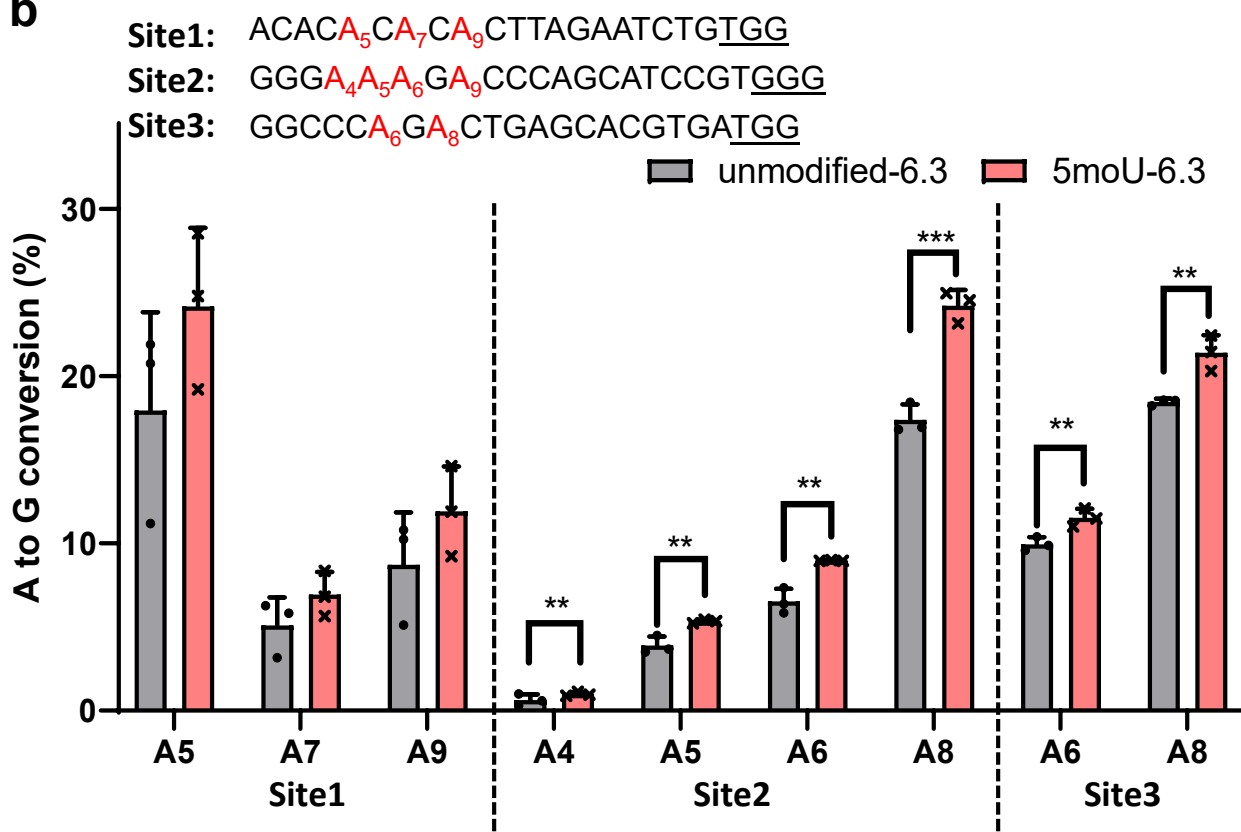

**Supplementary Figure 2. a**, Comparison of editing efficiency by unmodified (unmodified-6.3) and modified (5moU-6.3) ABE mRNA at different concentrations in HEK293T cells. Guide RNA is moderately modified sgRNA. A-to-G conversion rate represents the mean value of three independent experiments (n=3). The targeted editing site is highlighted in red. **b**, Comparison of editing efficiency by unmodified and modified ABE mRNA at the genomic sites shown in Fig1c, d, e in HEK293T cells. Guide RNAs are moderately modified sgRNA. Graphs show mean values. Data represent mean  $\pm$ SD (n = 3 biologically independent samples). \*\*, P= 0.0025, 0.0099, 0.0052; \*\*\*, P=0.0008; \*\*, P=0.0162, 0.009 (two tailed t-test). mRNA concentration=0.015ug. Source data are provided as a Source Data file for a, b.

# Supplementary Fig. 3

**a**

|           | Control | mRNA | plasmid |
|-----------|---------|------|---------|
| On-Target | 0.1     | 29.9 | 3.9     |

Off-target\_1: GAG<sup>A<sub>4</sub></sup><sup>A<sub>5</sub></sup><sup>A<sub>6</sub></sup><sup>G<sub>8</sub></sup>CCAGCATCCATAGG

|    | Control | mRNA  | plasmid |
|----|---------|-------|---------|
| A4 | 0.061   | 0.060 | 0.058   |
| A5 | 0.048   | 0.051 | 0.042   |
| A6 | 0.059   | 0.057 | 0.052   |
| A8 | 0.112   | 0.135 | 0.103   |

Off-target\_2: CAAG<sup>A<sub>5</sub></sup><sup>A<sub>6</sub></sup><sup>G<sub>8</sub></sup>CCCAGCTTCCGTAGG

|    | Control | mRNA  | plasmid |
|----|---------|-------|---------|
| A5 | 0.014   | 0.028 | 0.024   |
| A6 | 0.011   | 0.019 | 0.015   |
| A8 | 0.088   | 0.177 | 0.069   |

**b**

|           | Control | mRNA | plasmid |
|-----------|---------|------|---------|
| On-Target | 0.1     | 24.6 | 5.7     |

Off-target\_1: GAGCC<sup>A<sub>6</sub></sup><sup>G<sub>8</sub></sup><sup>A<sub>9</sub></sup>TGAGCACGTGAGGG

|    | Control | mRNA  | plasmid |
|----|---------|-------|---------|
| A6 | 0.016   | 0.017 | 0.015   |
| A8 | 0.016   | 0.033 | 0.016   |
| A9 | 0.089   | 0.101 | 0.079   |

Off-target\_2: AGCTC<sup>A<sub>6</sub></sup><sup>G<sub>8</sub></sup>CTGAGCAAGTGAGGG

|    | Control | mRNA  | plasmid |
|----|---------|-------|---------|
| A6 | 0.043   | 0.040 | 0.060   |
| A8 | 0.134   | 0.143 | 0.148   |

Off-target\_3: CACCC<sup>A<sub>6</sub></sup><sup>G<sub>8</sub></sup>CTGAGCACGTGCTGG

|    | Control | mRNA  | plasmid |
|----|---------|-------|---------|
| A6 | 0.023   | 0.033 | 0.025   |
| A8 | 0.035   | 0.171 | 0.031   |

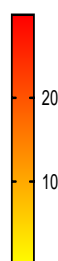

**Supplementary Figure 3. a**, Average triplicate A-to-G conversion rates (%) by RNA or DNA-encoded ABE at two top known off-target sites of guide RNA targeting the genomic site shown in Fig. 1d. The editing efficiency represents the mean value of three independent experiments. Off-target sites are as shown, and all the editable “A” sites are highlighted in red. **b**, Average triplicate A-to-G conversion rates (%) by RNA or DNA-encoded ABE at three top known off-target sites of guide RNA targeting the genomic site shown in Fig. 1e. The editing efficiency represents the mean value of three independent experiments. Off-target sites are as shown, and all the editable “A” sites are highlighted in red. Source data are provided as a Source Data file for a, b.

# Supplementary Fig. 4

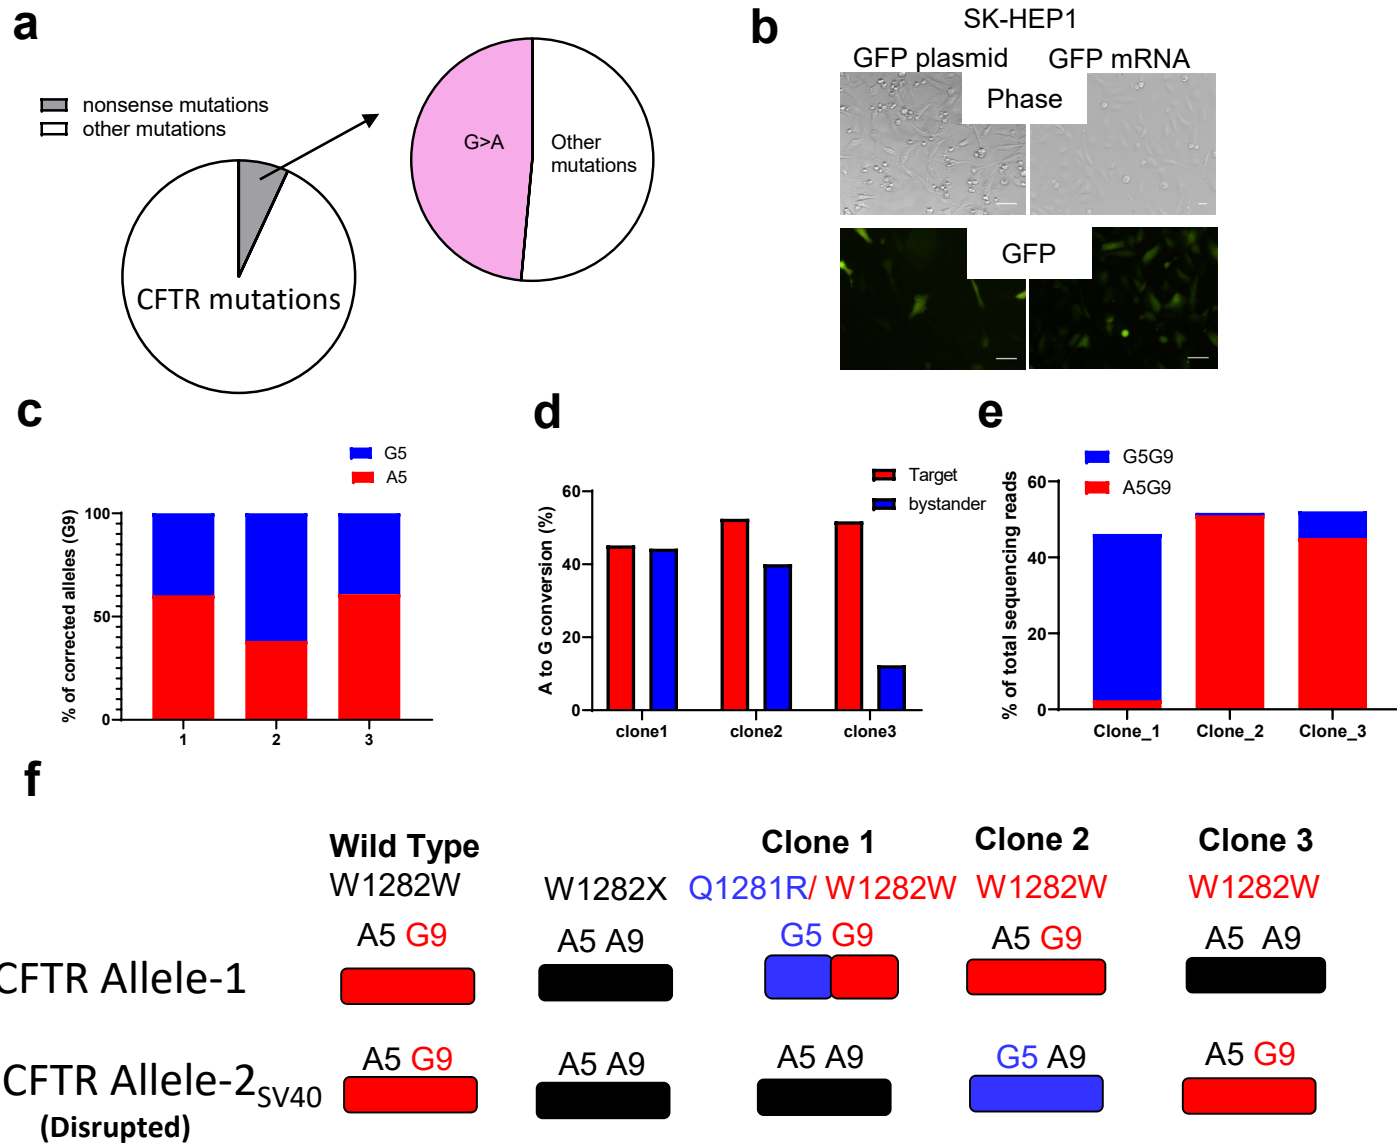

**Supplementary Fig.4.** **a**, Nonsense mutation frequency of all CF mutations (left graph), and G>A mutation frequency within all the CFTR nonsense mutations (right graph); concluded from CFTR2 database. **b**, Exogenous GFP DNA or mRNA expression in SK-HEP1 cells. 12hrs post electroporation, bright field (upper panel) and fluorescence images (lower panel) were taken. Scale bar=100  $\mu$ m. **c**, The frequency of bystander editing in the allele that contained the targeted correction. Three biologically independent experiments. Blue = with bystander editing; Red = without bystander editing. **d**, A-to-G conversion rate at target and bystander sites of three single-cell clones. **e**, The frequency of bystander and target conversion at one *CFTR* allele in the three selected single-cell clones. Clone 3 is likely a mixed clone, but majority of the reads (~80%) have targeted editing at one allele without bystander editing. Blue = with bystander editing; Red = without bystander editing. **f**, The status of editable sites on the *CFTR* alleles in selected single-cell clones, as inferred from sequencing, and *CFTR* expression and activity experiments. A5/G5: bystander site. A9/G9: target site. SV40 incorporated allele (allele-2) cannot express protein (Disrupted). Source data are provided as a Source Data file for c, d, e.

## Supplementary Fig. 5

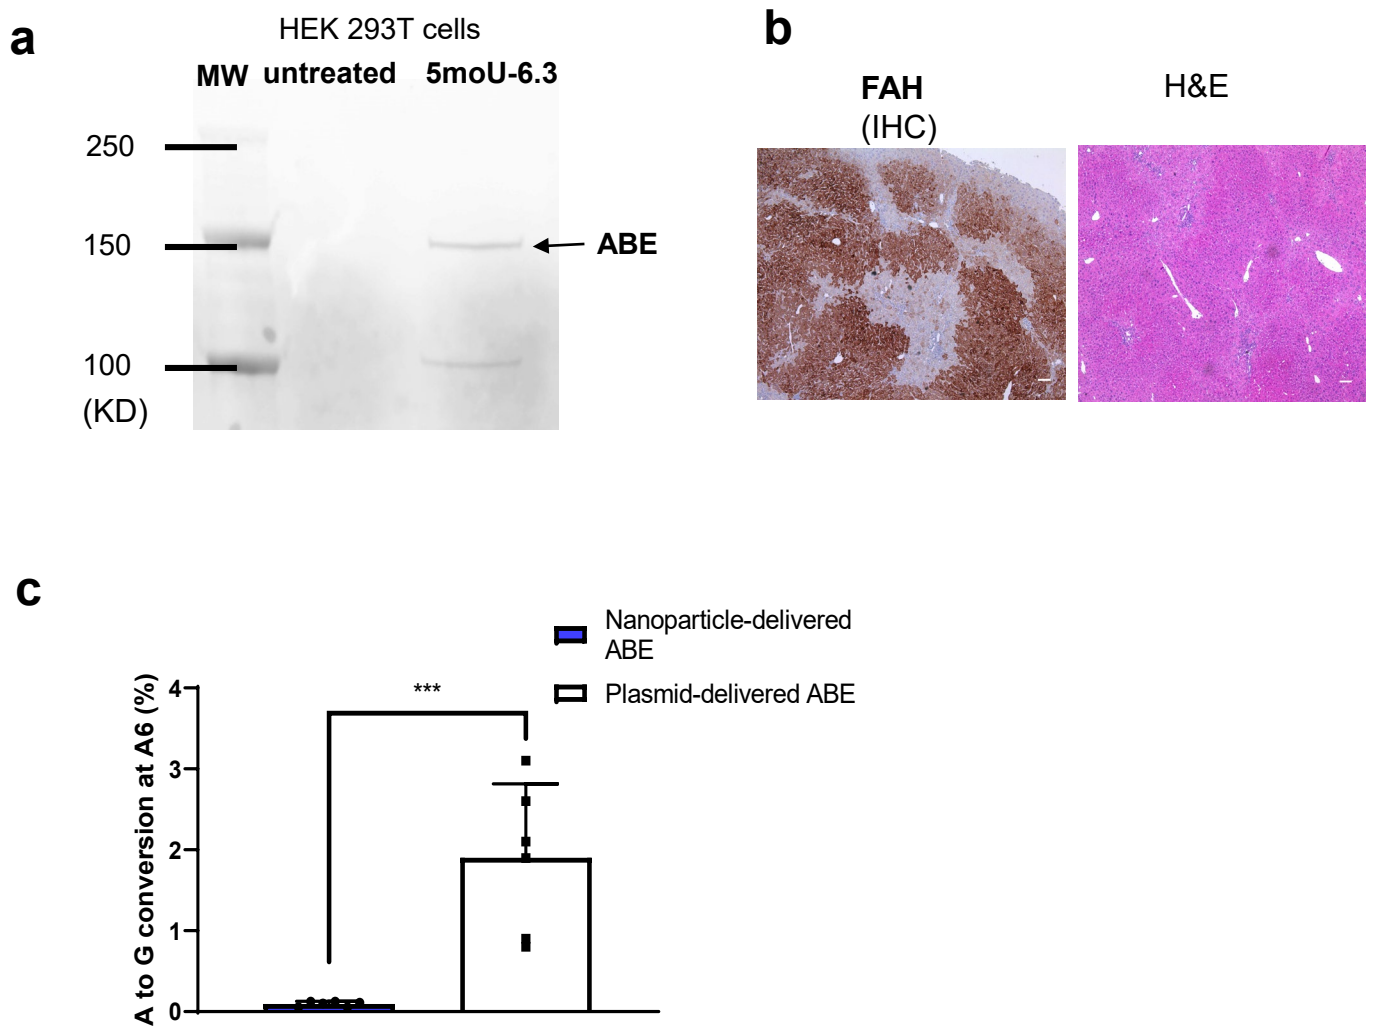

**Supplementary Fig.5. a**, Expression of LNP-delivered 5moU-6.3 in HEK293T cells. 4ul of ABE nanoparticle (0.9ug RA6.3 mRNA) was added to cell culture. After 6 hours, cell lysates were analyzed by western blot. Arrow indicates the full-length ABE protein band. **b**, Immunohistochemistry staining and Hematoxylin and Eosin staining (H&E) of mouse liver sections. Mouse was hydrodynamically injected with plasmids expressing RA6.3 and guide RNA (end point 48 days). Scale bar=100 $\mu$ m. **c**, A-to-G conversion rate at the bystander site (A6) of *Fah* locus by mRNA and DNA-expressing RA6.3 in vivo. Three liver samples (from different lobes) per mouse were collected and analyzed. \*\*\*, P=0.0006 (two tailed t-test). Data represent mean  $\pm$ SD. Source data are provided as a Source Data file for a, c.

### Reference:

1. Gaudelli, N. M. *et al.* Programmable base editing of A\*T to G\*C in genomic DNA without DNA cleavage. *Nature* **551**, 464-471, doi:10.1038/nature24644 (2017).

**Supplementary Table**

| Description                | Sequence                                                                                                                                                                   |
|----------------------------|----------------------------------------------------------------------------------------------------------------------------------------------------------------------------|
| Unmodified Tracr RNA       | rArArArCrArGrCrArUrArGrCrArArGrUrUr ArArArArUrArArGrGrCrUrArGrUrCrCrGrU<br>rUrArUrCrArArCrUrUrGrArArArArGrUr GrGrCrArCrCrGrArGrUrCrGrGrUrGrCrUr<br>UrUrUrUrUrU             |
| Medium-modified Tracr RNA  | mrA*mrA*mrA*rCrArGrCrArUrArGrCrArArGrUrUr<br>ArArArArUrArArGrGrCrUrArGrUrCrCrGrU rUrArUrCrArArCrUrUrGrArArArArGrUr<br>GrGrCrArCrCrGrArGrUrCrGrGrUrGrCrUr UrUrU*mrU*mrU*mrU |
| Unmodified crRNA           | rArCrArCrArCrArCrArCrUrUrArGrArArUrCrUrGrGrUrUrUrUrArGrArGrCrUrArUrGrCr<br>UrGrUrUrUrUrG                                                                                   |
| Medium-modified crRNA      | mrA*mrC*mrA*rCrArCrArCrArCrUrUrArGrArArUrCrUrGrGrUrUrUrUrArGrArGrCrUr<br>ArUrGrCrUrGrUrU*mrU*mrU*mrG                                                                       |
| Heavily-modified crRNA     | mA*mC*mA*rCrArC*rA*rC*/i2FA*/i2FC*/i2FU//i2FU/rA/i2FG//i2FA/rArU/i2FC/<br>/i2FU/rGrGrUrUrUrUrArGrArGrCrUrArUrGrCrUrGrUrUrUrUrG                                             |
| Site1_libF                 | CTACACGACGCTCTCCGATCTagcattacctgggagcctgtag                                                                                                                                |
| Site1_libR                 | AGACGTGTGCTCTTCCGATCTctcaaacttcagcgggcatcagaa                                                                                                                              |
| Site2_libF                 | CTACACGACGCTCTTCCGATCTcggcacgcccccttg                                                                                                                                      |
| Site2_libR                 | AGACGTGTGCTCTTCCGATCTgggtctctagaccagcgtctt                                                                                                                                 |
| Site3_libF                 | CTACACGACGCTCTTCCGATCTtctgctgcaagtaagcatgcat                                                                                                                               |
| Site3_libR                 | AGACGTGTGCTCTTCCGATCTaggaaaagctgtcctgcgac                                                                                                                                  |
| Deepsequence_2nd_common F  | AATGATACGGCGACCACCGAGATCTACACTCTTCCCTACACGACGCTCTTCCG                                                                                                                      |
| Deepsequence_2nd_Unique R1 | CAAGCAGAAGACGGCATAACGAGATCGTGATGTGACTGGAGTTCAGACGTGTGCTCTTCC<br>G                                                                                                          |
| Deepsequence_2nd_Unique R2 | CAAGCAGAAGACGGCATAACGAGATACATCGGTGACTGGAGTTCAGACGTGTGCTCTTCC<br>G                                                                                                          |



|                             |                                                                    |
|-----------------------------|--------------------------------------------------------------------|
| Deepsequence_2nd_Unique R3  | CAAGCAGAAGACGGCATAACGAGATGCCTAAGTGACTGGAGTTCAGACGTGTGCTCTTCC<br>G  |
| Deepsequence_2nd_Unique R4  | CAAGCAGAAGACGGCATAACGAGATTGGTCAGTGACTGGAGTTCAGACGTGTGCTCTTCC<br>G  |
| Deepsequence_2nd_Unique R5  | CAAGCAGAAGACGGCATAACGAGATCACTGTGTGACTGGAGTTCAGACGTGTGCTCTTCC<br>G  |
| Deepsequence_2nd_Unique R6  | CAAGCAGAAGACGGCATAACGAGATATTGGCGTGACTGGAGTTCAGACGTGTGCTCTTCC<br>G  |
| Deepsequence_2nd_Unique R7  | CAAGCAGAAGACGGCATAACGAGATGATCTGGTGACTGGAGTTCAGACGTGTGCTCTTCC<br>G  |
| Deepsequence_2nd_Unique R8  | CAAGCAGAAGACGGCATAACGAGATTCAAGTGTGACTGGAGTTCAGACGTGTGCTCTTCC<br>G  |
| Deepsequence_2nd_Unique R9  | CAAGCAGAAGACGGCATAACGAGATCTGATCGTGACTGGAGTTCAGACGTGTGCTCTTCC<br>G  |
| Deepsequence_2nd_Unique R10 | CAAGCAGAAGACGGCATAACGAGATAAGCTAGTGACTGGAGTTCAGACGTGTGCTCTTCC<br>G  |
| Deepsequence_2nd_Unique R11 | CAAGCAGAAGACGGCATAACGAGATGTAGCCGTGACTGGAGTTCAGACGTGTGCTCTTCC<br>G  |
| Deepsequence_2nd_Unique R12 | CAAGCAGAAGACGGCATAACGAGATTACAAGGTGACTGGAGTTCAGACGTGTGCTCTTCC<br>G  |
| Deepsequence_2nd_Unique R13 | CAAGCAGAAGACGGCATAACGAGATTTGACTGTGACTGGAGTTCAGACGTGTGCTCTTCC<br>G  |
| Deepsequence_2nd_Unique R14 | CAAGCAGAAGACGGCATAACGAGATGGAAGTGTGACTGGAGTTCAGACGTGTGCTCTTCC<br>G  |
| Deepsequence_2nd_Unique R15 | CAAGCAGAAGACGGCATAACGAGATTGACATGTGACTGGAGTTCAGACGTGTGCTCTTCC<br>G  |
| Deepsequence_2nd_Unique R16 | CAAGCAGAAGACGGCATAACGAGATGGACGGGTGACTGGAGTTCAGACGTGTGCTCTTCC<br>CG |
| Deepsequence_2nd_Unique R17 | CAAGCAGAAGACGGCATAACGAGATGCGGACGTGACTGGAGTTCAGACGTGTGCTCTTCC<br>G  |
| Deepsequence_2nd_Unique R18 | CAAGCAGAAGACGGCATAACGAGATTTTACGTGACTGGAGTTCAGACGTGTGCTCTTCC<br>G   |
| Deepsequence_2nd_Unique R19 | CAAGCAGAAGACGGCATAACGAGATGGCCACGTGACTGGAGTTCAGACGTGTGCTCTTCC<br>G  |
| Deepsequence_2nd_Unique R20 | CAAGCAGAAGACGGCATAACGAGATCGAAACGTGACTGGAGTTCAGACGTGTGCTCTTCC<br>G  |
| Deepsequence_2nd_Unique R21 | CAAGCAGAAGACGGCATAACGAGATCGTACGGTGACTGGAGTTCAGACGTGTGCTCTTCC<br>G  |

|                             |                                                              |
|-----------------------------|--------------------------------------------------------------|
| Deepsequence_2nd_Unique R22 | CAAGCAGAAGACGGCATAACGAGATCCACTCGTGACTGGAGTTCAGACGTGTGCTCTCCG |
| Deepsequence_2nd_Unique R23 | CAAGCAGAAGACGGCATAACGAGATATCAGTGTGACTGGAGTTCAGACGTGTGCTCTCCG |
| Deepsequence_2nd_Unique R24 | CAAGCAGAAGACGGCATAACGAGATAGGAATGTGACTGGAGTTCAGACGTGTGCTCTCCG |
| CFTR_lib_F                  | CTACACGACGCTCTCCGATCTGGAGAAATCCAGATCGATGG                    |
| CFTR_lib_R                  | AGACGTGTGCTCTTCCGATCTTTGAGTACAAGTATCAAATAGCAG                |
| <i>Fah</i> _lib_F           | CTACACGACGCTCTCCGATCTagagccaatccccattcca                     |
| <i>Fah</i> _lib_R           | AGACGTGTGCTCTTCCGATCTTGCATGGTATCACCCCTGTA                    |
| <i>Fah</i> _rt-pcr_F        | ttctactcttctcggcagca                                         |
| <i>Fah</i> _rt-pcr_R        | cggggagattgtggttccaa                                         |

## Supplementary Note

```
function basecall(WTnuc)

files=dir('* .fastq');
for d=1:n
    filename=files(d).name;
    [header,seqs,qscore]=fastqread(filename);
    seqsLength=length(seqs);
    seqsFile=strrep(filename, '.fastq', '');

    mkdir(seqsFile);
    wtLength = length(WTnuc);
    window=1:wtLength;
    sBLength=length(seqs);
    nskips=0;
    ALN=repmat('',[sBLength wtLength]);
    for i=1:sBLength

[score,alignment,start]=swalign(seqs{i},WTnuc,'Alphabet','NT');
        len=length(alignment(3,:));
        skip=0
        for j=1:len
            if (alignment(3,j)=='-'||alignment(1,j)=='-')
                skip=1;
                break
            end
            if isletter(qscore{i}(start(1)+j-1))
            else
                alignment(1,j)='N';
            end
        end
        if skip==0 && len>10
            ALN(i, start(2):(start(2)+length(alignment)-
1))=alignment(1,:);
```

```

    end
end
TallyNTD=zeros(5,wtLength);
FreqNTD=zeros(4,wtLength);
SUM=zeros(1,wtLength);
for i=1:wtLength

TallyNTD(:,i)=[sum(ALN(:,i)=='A'),sum(ALN(:,i)=='C'),sum(ALN(:,i)
=='G'),sum(ALN(:,i)=='T'),sum(ALN(:,i)=='N')];
    end
    for i=1:wtLength
        FreqNTD(:,i)=100*TallyNTD(1:4,i)/sum(TallyNTD(1:4,i));
    end
    for i=1:wtLength
        SUM(:,i)=sum(TallyNTD(1:4,i));
    end

    save(strcat(seqsFile, '/TallyNTD'), 'TallyNTD');
    dlmwrite(strcat(seqsFile, '/TallyNTD.csv'), TallyNTD,
'precision', '%.3f', 'newline','pc');
    save(strcat(seqsFile, '/FreqNTD'), 'FreqNTD');
    dlmwrite(strcat(seqsFile, '/FreqNTD.csv'), FreqNTD,
'precision', '%.3f', 'newline','pc');
    fid = fopen('FrequencySummary.csv', 'a');
    fprintf(fid, '\n \n');
    fprintf(fid, filename);
    fprintf(fid, '\n \n');
    dlmwrite('FrequencySummary.csv', FreqNTD, 'precision',
'%.3f', 'newline', 'pc', '-append');
    dlmwrite('FrequencySummary.csv', SUM, 'precision', '%.3f',
'newline', 'pc', '-append');
end

cd(folder name')
basecall(reference sequence')

```
